# Supplementary material for: Long non-coding RNA expression profile in cytogenetically normal acute myeloid leukemia identifies a distinct signature and a new biomarker in NPM1-mutated patients
Source: PubMed Central journal article supplement — Haematologica. 2017 Jul 4;102(10):1718–26. doi: 10.3324/haematol.2017.171645 (PMC5622856; doi:10.3324/haematol.2017.171645), 2017-10
Supplement: 2017.171645.DE_CLARA_SUPPL.pdf [file 2017.171645.DE_CLARA_SUPPL.pdf]

# Long non-coding RNA expression profile in cytogenetically normal acute myeloid leukemia identifies a distinct signature and a new biomarker in NPM1-mutated patients

Etienne De Clara,<sup>1</sup> Morgane Gourvest,<sup>1</sup> Hanjing Ma,<sup>2</sup> François Vergez,<sup>1,3</sup> Marie Tosolini,<sup>1</sup> Sébastien Dejean,<sup>4</sup> Cécile Demur,<sup>1,3</sup> Eric Delabesse,<sup>1,3</sup> Christian Recher,<sup>1,3</sup> Christian Touriol,<sup>1</sup> Maria Paola Martelli,<sup>5</sup> Brunangelo Falini,<sup>5</sup> Pierre Brousset<sup>1,6</sup> and Marina Bousquet<sup>1</sup>

*EDC, MG and HM contributed equally to this work.*

<sup>1</sup>Cancer Research Center of Toulouse (CRCT), UMR1037 Inserm/Université Toulouse III Paul Sabatier, ERL5294 CNRS, Laboratoire d'Excellence Toulouse Cancer (TOUCAN), France; <sup>2</sup>BGI, Shenzhen, China; <sup>3</sup>Laboratoire et Service d'Hématologie, Centre Hospitalier Universitaire de Toulouse, Institut Universitaire du Cancer, France; <sup>4</sup>Institut de Mathématiques de Toulouse, UMR 5219 Université de Toulouse/CNRS Université Paul Sabatier, France; <sup>5</sup>Institute of Hematology, University of Perugia, Ospedale S. Maria della Misericordia, Italy and <sup>6</sup>Department of Pathology, Institut Universitaire du Cancer de Toulouse-Oncopole and Centre Hospitalier Universitaire de Toulouse, France

©2017 Ferrata Storti Foundation. This is an open-access paper. doi:10.3324/haematol.2017.171645

Received: April 25, 2017.

Accepted: June 22, 2017.

Pre-published: July 04, 2017.

Correspondence: bousquetmarina@gmail.com

---

## **SUPPLEMENTARY DATA**

### **SUPPLEMENTARY METHODS**

#### AML samples

Cohort 1 was composed of forty CN-AML samples collected from patients registered at the HIMIP (Hémopathies INSERM Midi-Pyrénées) collection. For the validation cohort (Cohort 2, n=134), thirty-four CN-AML samples were obtained from the HIMIP collection, 7 CN-AML samples from the Hematology Institute of Perugia University and 93 CN-AML samples from the FILOtheque AML, Paris. Fresh and thawed samples were obtained after informed consent and the study was conducted in accordance with the Declaration of Helsinki and was approved by a local ethics committee.

Seventy-four AML samples (40 samples for Cohort 1 and 34 samples for Cohort 2) were collected from patients registered at the HIMIP. In accordance with French law, the HIMIP collection has been declared to the Ministry of Higher Education and Research (DC 2008-307 collection 1) and a transfer agreement has been obtained (AC 2008-129) after approbation by local ethical committees (the Comité de Protection des Personnes Sud-Ouest et Outremer II and the APHP ethical committee). Clinical and biological annotations have also been declared to the CNIL (Comité National Informatique et Libertés).

Seven AML samples were obtained from the Hematology Institute of Perugia University. These patients had received standard induction regimens (i.e. an anthracycline and cytarabine “3+7” combination). Patients who had achieved complete remission received one or two cycles of consolidation therapy and/or allogeneic stem cell transplantation.

Ninety-three AML samples (included in Cohort 2) were collected from patients registered at the FILOtheque. The handling, conditioning and storing of patient samples was performed by the FILOtheque AML (N° BB-0033-00073) tumor bank of the FILO group, Cochin Hospital, Paris. Fifty-four patients were enrolled in the AML 2006 IR trial and thirty-nine

patients in the AML 2007 SA trial. AML 2006 IR was a multicenter, randomized, open-label, phase III trial assessing the efficacy of gemtuzumab ozogamycin (GO, or MYLOTARG) in association with intensive chemotherapy in intermediate risk AML patients aged 18 to 60 years, in which patients received standard daunorubicin/cytarabine induction therapy with or without GO at a dose of 6 mg/m<sup>2</sup> on day 4. AML 2007 SA was a multicenter randomized trial comparing induction therapy with IC (idarubicin and cytarabine, “5+7”) to ICL (the same drugs plus lomustine (CCNU), 200 mg/m<sup>2</sup> administered orally at day 1) in patients older than 60 years. Patients in complete remission (CR) received a post-remission schedule with or without lomustine, according to randomization.

For prognosis analysis, we discarded patients that had not received intensive chemotherapy, who were older than 75 years old and for whom no clinical information was available.

#### RNA isolation and cDNA synthesis

Total RNAs were extracted with the TRIzol reagent (Ambion, Austin, TX, USA). RNA integrity was evaluated using the RNA 6000 Nano Chip kit (Agilent Technologies, Massy, France). Only RNA extracts with RNA integrity values  $\geq 7$  underwent further reverse transcription. All samples were reverse transcribed using the Superscript II reverse transcription kit (Invitrogen, Beijing, China), according to the manufacturer's protocol.

#### RNA sequencing library preparation, read generation and mapping

RNA sequencing was performed at the BGI (Hong Kong) for samples from Cohort 1 (n=40) and two CD33+ bone marrow cells from healthy samples (Stemcell; ABM032F). rRNA depletion was performed from total RNA with Ribo-Zero™ rRNA Removal Kits (Epicentre, Madison, WI, USA). Paired-end, strand-specific reads of 91 nt were generated on an Illumina HiSeq™2000. Alignment and mapping were performed using Tophat<sup>1</sup> against the hg19

genome and the mapped reads were assembled by Cufflinks 2.0.2<sup>2</sup>. The Cuffcompare program was used to merge the RefSeq, ENCODE and UCSC human known genes freeze January 2013 into one gene annotation set for comparison with the assembled transcripts<sup>3</sup>. For novel lncRNA prediction, transcripts with a length >200 nt were extracted, according to the definition of lncRNA. Multi-exon ( $\geq 2$  exons) transcripts and single-exon transcripts which recurred in multiple samples ( $\geq 3$  samples) were then extracted. Assemblies that had long ( $\geq 300$  nt) putative open reading frames (ORFs) were excluded. In order to filter out the known lncRNAs, the filtered assembly transcripts were BLASTed to find known lncRNAs from the ENCODE, Refseq and UCSC databases, according to the thresholds: identity >0.9 and coverage >0.8. Transcripts which did not match known lncRNAs were then used for protein annotation. The transcripts were aligned to four protein databases: kegg, nr, cog and swissprot, according to the thresholds: identity >0.9 and coverage >0.8. The coding potential of extracted transcripts which did not align with the protein databases was assessed using CPC based on six biologically meaningful sequence features such as ORF score, coverage, integrity, number of hits, hit score and frame score<sup>4</sup>. Known lncRNAs and predicted novel lncRNAs were then combined as the reference, and reads were aligned to this reference by SOAP2<sup>5</sup>. Among the 35046 putative lncRNA transcripts expressed in our samples, we selected only lncRNAs that were at least 90% identical to the reference transcript in at least two samples. Gene expression levels were calculated using the RPKM (Reads Per Kb per Million) method<sup>6</sup>. The raw and processed RNA-sequencing data have been deposited at the National Center for Biotechnology Information Gene Expression Omnibus (repository number GSE62852).

## Statistical analysis

All unsupervised clustering and heatmap generations were performed using the «*hclust*» function in R and the Ward's agglomeration method. The partial least squares discriminant analysis (PLS-DA) and the sparse PLS-DA methods were used using the R *mixOmics* package. The “Perf” method, from the “*Mixomics*” package, was used to estimate the error rate of the model using leave-one-out cross-validation. Bootstrapping cluster analysis was carried out using the R *ClassDiscovery* package (1000-fold re-sampling).

Expression correlation between RNAseq and Fluidigm data was assessed using the Pearson correlation.

Event-Free Survival (EFS) was calculated from the date of diagnosis until relapse, death, treatment failure or the last received news. Overall survival (OS) time was calculated from the date of diagnosis until death or last received news. Disease-Free Survival (DFS) was calculated from the date of Complete Remission (CR) until relapse, death or last news. Surviving patients were censored at the date of last follow-up. For patients who underwent allogeneic transplantation, EFS, OS and DFS times were censored at the time of transplantation.

ROC curve analysis was performed to determine a suitable  $-\Delta\text{Ct}$  cut-off value for each lncRNA. ROC curve analysis for EFS was performed 500 times on 13 randomly selected patients (5 *NPM1*<sup>+</sup> patients and 8 *NPM1*-wild type patients) from Cohort 1. The final cutoff was taken as the mean of the 500 cutoffs. This cutoff was applied to Cohorts 1 and 2 to define the patient subgroups with high and low expression of each lncRNA.

The Kaplan-Meier method was used to generate survival curves, and these curves were compared using a log-rank test.

The Fisher exact test and the Mann Whitney test were used to assess the statistical significance of the differences between groups.

Cox proportional hazards model was used for EFS, OS and DFS to calculate univariable HRs. Multivariate Cox proportional hazards regression models were constructed for EFS, OS and DFS using a limited forward selection procedure. The following variables were first evaluated in univariate models: age; sex; leucocyte count; hemoglobin; platelet count; bone marrow blast percentage; treatment; ELN classification; presence of *NPM1*, *FLT3*-ITD, *DNMT3a*, *CEBPa*, *IDH1R132* or *IDH2R140* mutations; and the expression level of XLOC\_109948. Variables with a univariate  $p < 0.1$  were included in the initial multivariate models, and a stepwise backward variable selection procedure was applied.

For all analyses,  $p$ -values  $< 0.05$  were considered significant.

All analyses were performed using the R 3.0.0 software package (available at [www.r-project.org](http://www.r-project.org)).

#### Quantitative real-time reverse transcriptase polymerase chain reaction analysis

Total RNA was isolated 48h post-transfection using the Trizol extraction protocol according to the manufacturer's instructions. Reverse transcription was performed with Superscript III reverse transcriptase (Invitrogen). Quantitative polymerase chain reaction (PCR) was performed with SYBR Premix Ex Taq (TAKARA) on 384-well plates using the Lightcycler 480 (Roche). The data presented correspond to the mean of  $2^{-\Delta\Delta Ct}$  from at least three independent experiments, normalized to the ABL1 and TBP reference genes.

## REFERENCES

- 1 Trapnell C, Pachter L, Salzberg SL. TopHat: discovering splice junctions with RNA-Seq. *Bioinformatics* 2009; **25**: 1105–1111.
- 2 Trapnell C, Williams BA, Pertea G, *et al.* Transcript assembly and quantification by RNA-Seq reveals unannotated transcripts and isoform switching during cell differentiation. *Nat Biotechnol* 2010; **28**: 511–515.
- 3 Trapnell C, Roberts A, Goff L, *et al.* Differential gene and transcript expression analysis of RNA-seq experiments with TopHat and Cufflinks. *Nat Protoc* 2012; **7**: 562–578.
- 4 Kong L, Zhang Y, Ye Z-Q, *et al.* CPC: assess the protein-coding potential of transcripts using sequence features and support vector machine. *Nucleic Acids Res* 2007; **35**: W345–349.
- 5 Li R, Yu C, Li Y, *et al.* SOAP2: an improved ultrafast tool for short read alignment. *Bioinformatics* 2009; **25**: 1966–1967.
- 6 Mortazavi A, Williams BA, McCue K, Schaeffer L, Wold B. Mapping and quantifying mammalian transcriptomes by RNA-Seq. *Nat Methods* 2008; **5**: 621–628.

**SUPPLEMENTARY FIGURES AND TABLES**

**Figure S1: Specific LncRNA expression profile in *NPM1*-mutated AML patients with normal cytogenetics.** A Hierarchical clustering and associated heatmap of RNAseq data from the first cohort of CN-AML patients (n=40) with 33 lncRNAs differentially-expressed between *NPM1*-mutated (n=14) and *NPM1*-wild type patients (n=26). B Hierarchical clustering and associated heatmap of RNAseq data from the first cohort of CN-AML patients (n=40) with 12 lncRNAs differentially-expressed between *NPM1*-mutated (n=14) and *NPM1*-wild type patients (n=26). The heatmap depicts high expression (red, +1) and low expression (blue, -1).

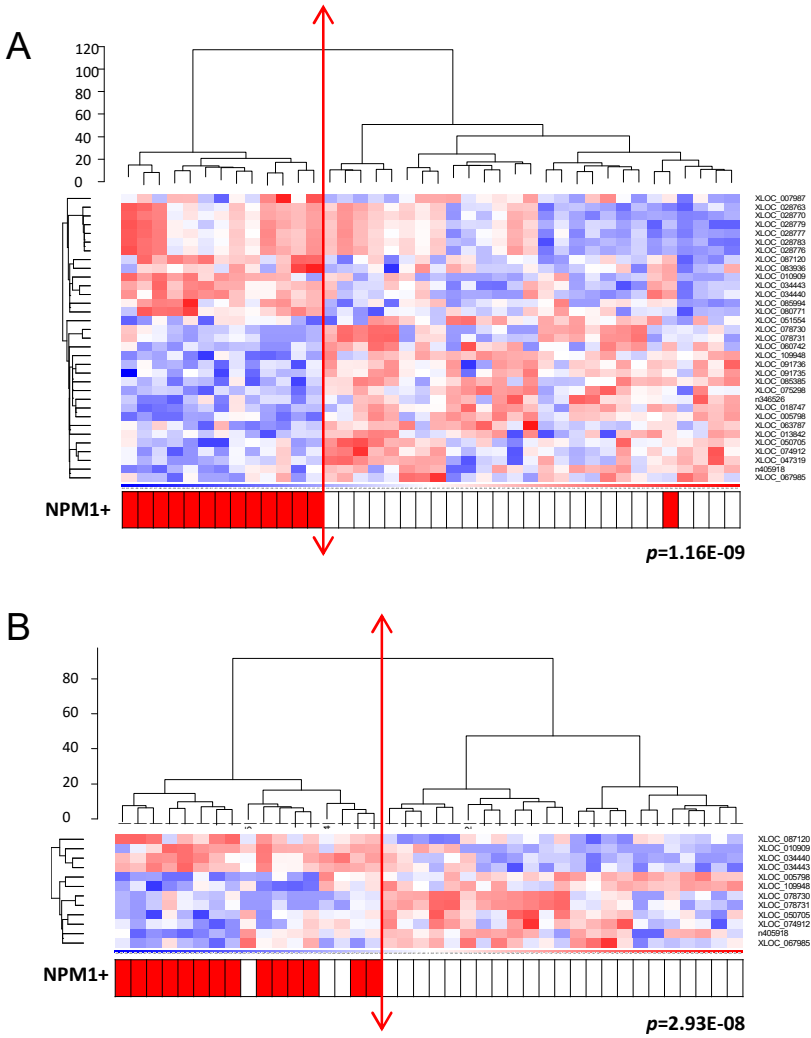



**Figure S2: Bootstrapping cluster analysis showing the stability of the groups based on the 12 lncRNA signature.** Bootstrapping analysis results using the 12 lncRNA signature with Cohorts 1 (A) and 2 (B) (1000-fold re-sampling). Hierarchical clustering was used, with Euclidean distance and Ward’s method for agglomeration. The purity of the color corresponds to the stability of the samples in the specific groups. Analyses were carried out in R using the ClassDiscovery package.

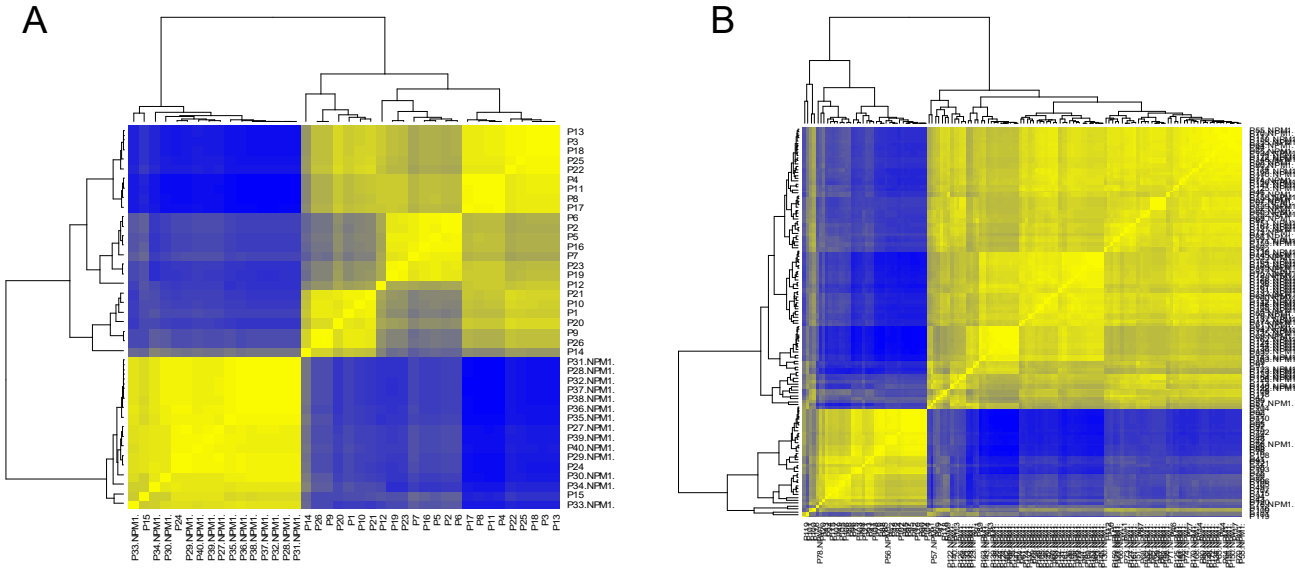

**Figure S3: RNA-seq quantification of XLOC\_109948 lncRNA expression level in normal CD33+ bone marrow (BM) cells compared to CN-AML samples. RPKM, Reads Per Kb per Million.**

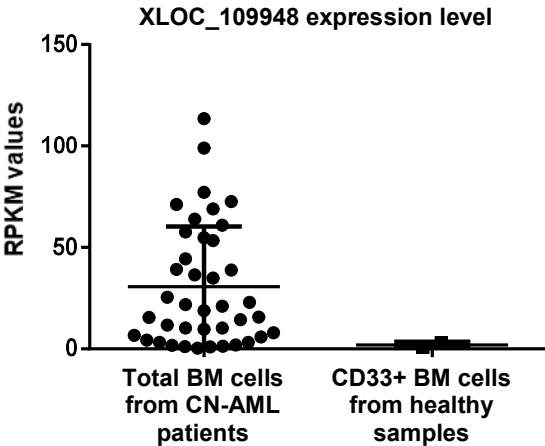

**Table S1: Patient characteristics**

| <b>Characteristics</b>                                   | <b>Cohort 1 (n=40)</b> | <b>Cohort 2 (n=134)</b> |
|----------------------------------------------------------|------------------------|-------------------------|
| <b>Female Sex</b>                                        |                        |                         |
| No.                                                      | 19                     | 67                      |
| %                                                        | 47.5                   | 50                      |
| <b>Age at diagnosis</b>                                  |                        |                         |
| Median                                                   | 67.5                   | 55.4                    |
| Range                                                    | 16-87                  | 20-75                   |
| <b>French American British classification (FAB)</b>      |                        |                         |
| M0                                                       | 0 (0%)                 | 4 (3%)                  |
| M1                                                       | 14 (35%)               | 38 (28%)                |
| M2                                                       | 9 (22.5%)              | 46 (34%)                |
| M4                                                       | 13 (32.5%)             | 23 (17%)                |
| M5                                                       | 3 (7.5%)               | 19 (14%)                |
| M6                                                       | 1 (2.5%)               | 0 (0%)                  |
| NC                                                       | 0 (0%)                 | 5 (4%)                  |
| <b>European Leukemia Net Classification (ELN)</b>        |                        |                         |
| Favorable                                                | 8 (20%)                | 46 (34%)                |
| Intermediate I                                           | 32 (80%)               | 88 (66%)                |
| <b>White Blood Cells Count (x10<sup>9</sup> cells/L)</b> |                        |                         |
| Median                                                   | 30.5                   | 34.5                    |
| Range                                                    | 1.23-206               | 0.9-250                 |
| <b>Hemoglobin level (g/dL)</b>                           |                        |                         |
| Median                                                   | 10.1                   | 9.35                    |
| Range                                                    | 5.5-14.2               | 5.5-14.1                |
| <b>Platelet count (x10<sup>9</sup> cells/L)</b>          |                        |                         |
| Median                                                   | 79.5                   | 73                      |
| Range                                                    | 8-735                  | 10-489                  |
| <b>Bone Marrow Blast Count (%)</b>                       |                        |                         |
| Median                                                   | 79.5                   | 73                      |
| Range                                                    | 19-99                  | 10-100                  |
| <b>Mutational Status</b>                                 |                        |                         |
| <i>NPM1</i> mutation                                     | 14/40 (35%)            | 80/134 (60%)            |
| <i>FLT3</i> -ITD mutation                                | 13/40 (32.5%)          | 58/134 (43%)            |
| <i>CEBPa</i>                                             | 6/18 (33.5%)           | 16/119 (12%)            |
| <i>DNMT3a</i>                                            | 11/40 (27.5%)          | 19/86 (22%)             |
| <i>IDH1</i> R132                                         | 4/40 (10%)             | 11/83 (13%)             |
| <i>IDH2</i> R140                                         | 8/40 (20%)             | 17/83 (20%)             |
| <b>Chemotherapy</b>                                      |                        |                         |
| Intensive                                                | 25 (62.5%)             | 134 (100%)              |
| NC                                                       | 4 (10%)                | 0 (0%)                  |

NC: Not Communicated

**Table S2: Primer list.**

| lncRNAs            | Forward Primer                  | Reverse Primer                 |
|--------------------|---------------------------------|--------------------------------|
| n346526            | GGAGAGCTTGGGTGAGGACCAC          | AAGGGGGCTCAGCAGGTGATAA         |
| n405918            | AGCTTCGGCTATGGGACTGGTT          | CGCATGATCTCTCAGTCCAGGTC        |
| XLOC_005798        | GGCAGTCAGGAAGGAAAAGTGG          | CGGTGGCTGTTTCTCCACTGTC         |
| XLOC_007987        | AAACCCACCAACGTGACCAGAA          | GCATCCTGGCAAATGAGGACAT         |
| XLOC_010909        | GACAAGGGGGAGACTACAAGAAGCA       | CTGCGCTCAAGCTCGAAGAGTAA        |
| XLOC_013842        | GGTTTGGAGTGAAAGGCACATGA         | CCAGGCAGCACTATCTGGGAAA         |
| XLOC_018747        | GCCTGGACAGATTACCAGATCATCA       | AGCAAGCTGGAAGCTGAGCTCTT        |
| XLOC_028763        | CAGGCACCAGGAGAGGAGACAC          | CACGGGGACCCCTGAACTTAAA         |
| XLOC_028770        | TCCGGTCATTGAAAAGTGCAT           | AGGGTTTCCTGGCCAACTTGAG         |
| XLOC_028776        | CTTTTGGTGGCCAAATCCTGTG          | ACGGTTTCACCCCTAGTGCAT          |
| XLOC_028777        | TTTGCTGCTCACCTGCTGTGAC          | TCTAGGCTGGAGGCAGTGAGGA         |
| XLOC_028779        | TGAGCTTCCCCACTGCATGAAT          | AGGCCGAAATGATTGTGATGTGA        |
| XLOC_028783        | CCTGGGCCAATCACTGATGTTC          | GGGCAGGAAAGCTGTCAGTCAC         |
| XLOC_034440        | TGCTTAGTGAAAGATGCCAGACAAAA      | TCCCCAGGCAGTAACCAAAGT          |
| XLOC_034443        | TGCACCGACTGACAGAATGAGG          | TCCAGGGTTCCAAGATAGCGAAA        |
| XLOC_047319        | TCATCAGCCTCCTGCTCCACTC          | TGATTACCACGCAAGGCTGACA         |
| XLOC_050705        | TTCCCGGTGGGTGTCATATCAG          | CTAGCAGCCCCTCCCTCCATC          |
| XLOC_060742        | GGGAATGGAGAATTACCCTCTGGA        | AAACAGGCCATTGACAGGTAGACAA      |
| XLOC_063787        | GCCAATGCCAACTTCACTCCAG          | ACGCAGCCTCATACACCCATTG         |
| XLOC_067985        | GCAAATGGCCTCCAAATCAAAA          | AGCCACAGATCCATTGCTGACC         |
| XLOC_074912        | CACAGGTGAATCTCCGCTGTCA          | ATCCTTTGCTGGGGTTGGAAAA         |
| XLOC_075298        | TTGGGACTACCACCCAAAGCAG          | GGTGTGAGCCATTCTGCTGGAA         |
| XLOC_078730        | GCATGCTAAGAGCCCATGAAGC          | AGAAGCTGGCCCAAGTGTGTGT         |
| XLOC_078731        | GGCCAGGTGCAGTAGTTCATGC          | AAACAAGGTTCCCACGGCTGAT         |
| XLOC_080771        | TACATGTGCCATGGTGGTTTGC          | TAGGGGGCTAGGGGAGGGATAG         |
| XLOC_083936        | GCAATCTCGGCTCACTGCAACT          | TGTGGCAGGTGCCTGTCTGTAG         |
| XLOC_085385        | TCCATTTTGGAGGCTGGGAAGT          | TAGGGAGTTGGCCATCTGCAAG         |
| XLOC_085994        | GACCGAGATGAGGCAAAGAGCA          | GAGCAATGGGGATAGTGCCACA         |
| XLOC_087120        | CCATGCACCAGGCACTGTAATG          | TGGGTAGCACCTCTCCATGAGC         |
| XLOC_091735        | GCTGGTGGAAAGGTCTGTTCTGC         | TGGCAGCAAGGATTTGCTAAGG         |
| XLOC_091736        | AAGAACCCGTGTCAGGCTTGTG          | CCTCTGACAGCCAGCAAGGAAA         |
| XLOC_109948        | CCTGCCTTCTTGTCTCCACCT           | GGCCAGGAAACAAATTGCAACA         |
| Housekeeping genes | Forward Primer                  | Reverse Primer                 |
| <i>MLN51</i>       | TAATCCCAGTTACCCTTATGCTCCA       | GTTATAGTAGGTCCTCCTCCATATACCTGT |
| <i>5S</i>          | ACGCGCCCCGATCTCGTCTGAT          | GCCTACAGCACCCGGTATTCCC         |
| <i>GAPDH</i>       | CGGGAAGCTTGTCAATGG              | GGCAGTGATGGCATGGACTG           |
| <i>TBP</i>         | GCCTCCCCACCCCTTCTTT             | GCCACACCTGCAACTCAACATCC        |
| <i>ABL1</i>        | TGGAGATAACACTCTAAGCATAACTAAAGGT | GATGTAGTTGCTTGGGACCCA          |
| <i>ACTIN</i>       | TCCCTGGAGAAGAGCTACGA            | AGGAAGGAAGGCTGGAAGAG           |
| <i>S14</i>         | ATCAAACCTCCGGGCCACAGGA          | GTGCTGTCAGAGGGGATGGGG          |

| Antisense LNA<br>GapmeRs | Sequence 5'-3'   |  |
|--------------------------|------------------|--|
| XLOC_109948a             | TCTGTGGAGCTGTAAC |  |
| XLOC_109948b             | CACTAGAGGCAGGAAC |  |
| Negative control A       | AACACGTCTATACGC  |  |

**Table S3: List of mRNAs differentially-expressed between *NPM1*-mutated and *NPM1*-wild type patients from RNA sequencing data (EdgeR analysis).** Highlighted genes are those known to be deregulated between *NPM1*-mutated versus *NPM1*-wild type AML patients. logFC (log Fold Change), log CPM (log Count per million), FDR (False Discovery Rate).

| GeneID                                  | logFC | logCPM | PValue   | FDR      |
|-----------------------------------------|-------|--------|----------|----------|
| Over-expressed in NPM1 mutated patients |       |        |          |          |
| <b>FOXC1</b>                            | 3,80  | 6,62   | 1,12E-07 | 2,49E-05 |
| <i>SERPINB2</i>                         | 3,76  | 7,24   | 1,89E-07 | 3,66E-05 |
| <b>HOXA5</b>                            | 3,26  | 5,57   | 8,13E-10 | 4,35E-07 |
| <b>HOXA6</b>                            | 3,07  | 4,56   | 9,94E-08 | 2,38E-05 |
| <i>PTPN14</i>                           | 2,92  | 5,29   | 8,63E-08 | 2,31E-05 |
| <i>PTX3</i>                             | 2,91  | 5,09   | 8,41E-09 | 3,07E-06 |
| <b>HOXB3</b>                            | 2,87  | 5,99   | 7,27E-10 | 4,14E-07 |
| <i>KRT18</i>                            | 2,85  | 4,45   | 2,07E-06 | 2,35E-04 |
| <i>CD300E</i>                           | 2,64  | 6,69   | 9,94E-05 | 3,71E-03 |
| <b>HOXB4</b>                            | 2,61  | 5,45   | 9,03E-10 | 4,57E-07 |
| <i>IFIT2</i>                            | 2,49  | 6,24   | 2,03E-05 | 1,24E-03 |
| <i>NEU4</i>                             | 2,44  | 4,85   | 4,57E-05 | 2,16E-03 |
| <i>TP53INP2</i>                         | 2,40  | 5,81   | 7,70E-11 | 9,70E-08 |
| <i>PHLDA1</i>                           | 2,27  | 5,60   | 7,67E-06 | 6,47E-04 |
| <b>HOXA7</b>                            | 2,26  | 3,60   | 3,46E-05 | 1,81E-03 |
| <i>ETV5</i>                             | 2,21  | 3,91   | 8,32E-09 | 3,07E-06 |
| <i>IRAK2</i>                            | 2,19  | 4,33   | 1,27E-05 | 9,31E-04 |
| <b>PBX3</b>                             | 2,14  | 6,04   | 2,35E-13 | 7,15E-10 |
| <b>MEIS1</b>                            | 2,11  | 6,82   | 7,39E-07 | 1,04E-04 |
| <b>HOXA9</b>                            | 2,00  | 6,99   | 4,75E-05 | 2,20E-03 |
| Down-regulated in NPM1 mutated patients |       |        |          |          |
| <b>HGF</b>                              | -2,03 | 5,91   | 3,09E-07 | 5,21E-05 |
| <i>FZD6</i>                             | -2,03 | 3,64   | 9,55E-05 | 3,64E-03 |
| <i>FAM105A</i>                          | -2,04 | 5,47   | 3,93E-06 | 3,73E-04 |
| <i>C18orf1</i>                          | -2,08 | 5,28   | 2,28E-06 | 2,54E-04 |
| <i>CEACAM4</i>                          | -2,12 | 4,69   | 1,54E-06 | 1,90E-04 |
| <i>MYEF2</i>                            | -2,18 | 4,08   | 1,59E-05 | 1,07E-03 |
| <i>STK32B</i>                           | -2,18 | 3,22   | 1,72E-05 | 1,15E-03 |
| <i>LY9</i>                              | -2,19 | 3,59   | 1,79E-06 | 2,07E-04 |
| <i>GATM</i>                             | -2,22 | 3,51   | 1,86E-05 | 1,20E-03 |
| <i>SLAIN1</i>                           | -2,24 | 4,06   | 2,80E-06 | 2,93E-04 |
| <i>TRPS1</i>                            | -2,27 | 6,50   | 3,57E-08 | 1,08E-05 |
| <i>TNXB</i>                             | -2,29 | 5,50   | 1,01E-04 | 3,72E-03 |
| <i>GNAI1</i>                            | -2,34 | 4,89   | 3,23E-04 | 8,04E-03 |
| <i>COBLL1</i>                           | -2,34 | 4,75   | 4,49E-07 | 7,05E-05 |

|                 |       |      |          |          |
|-----------------|-------|------|----------|----------|
| <i>NRP1</i>     | -2,41 | 3,99 | 1,51E-04 | 4,78E-03 |
| <i>SPRY1</i>    | -2,42 | 4,78 | 2,53E-07 | 4,44E-05 |
| <i>PFKFB2</i>   | -2,43 | 5,28 | 5,28E-09 | 2,30E-06 |
| <i>IGJ</i>      | -2,52 | 7,66 | 2,65E-05 | 1,50E-03 |
| <i>PROM1</i>    | -2,53 | 6,82 | 5,94E-05 | 2,57E-03 |
| <i>LTF</i>      | -2,57 | 9,21 | 1,05E-04 | 3,78E-03 |
| <i>HLA-DQA1</i> | -2,60 | 5,94 | 3,85E-04 | 9,13E-03 |
| <i>HIST1H3G</i> | -2,62 | 7,50 | 4,40E-08 | 1,25E-05 |
| <i>C10orf10</i> | -2,62 | 4,43 | 2,90E-06 | 2,98E-04 |
| <i>MN1</i>      | -2,68 | 4,58 | 1,02E-05 | 7,83E-04 |
| <i>STARD9</i>   | -2,71 | 5,64 | 5,71E-09 | 2,36E-06 |
| <i>SPARC</i>    | -2,72 | 6,10 | 6,78E-12 | 1,54E-08 |
| <i>FAM111B</i>  | -2,79 | 3,92 | 1,13E-09 | 5,41E-07 |
| <i>AKT3</i>     | -2,82 | 5,86 | 6,18E-10 | 3,75E-07 |
| <i>SETBP1</i>   | -2,82 | 4,22 | 2,62E-07 | 4,50E-05 |
| <i>NAV1</i>     | -2,86 | 4,08 | 1,37E-08 | 4,46E-06 |
| <i>RASD1</i>    | -2,88 | 4,83 | 5,73E-06 | 5,28E-04 |
| <i>PRR5L</i>    | -2,91 | 4,98 | 2,42E-06 | 2,66E-04 |
| <i>KLHL13</i>   | -2,92 | 4,25 | 3,73E-08 | 1,10E-05 |
| <i>ADAMTS10</i> | -3,03 | 4,61 | 1,74E-07 | 3,44E-05 |
| <i>CD200</i>    | -3,07 | 4,10 | 2,20E-06 | 2,47E-04 |
| <i>APP</i>      | -3,11 | 6,96 | 1,10E-07 | 2,49E-05 |
| <i>ACY3</i>     | -3,11 | 4,46 | 4,57E-05 | 2,16E-03 |
| <i>IKZF2</i>    | -3,16 | 5,30 | 5,29E-09 | 2,30E-06 |
| <i>TMIGD2</i>   | -3,25 | 3,92 | 3,44E-10 | 2,41E-07 |
| <i>SLCO5A1</i>  | -3,26 | 4,12 | 2,48E-06 | 2,66E-04 |
| <i>HLA-DOA</i>  | -3,30 | 5,61 | 1,80E-10 | 1,36E-07 |
| <i>MLLT3</i>    | -3,67 | 5,53 | 1,76E-20 | 1,61E-16 |
| <i>L3MBTL4</i>  | -3,68 | 3,83 | 9,27E-08 | 2,38E-05 |
| <i>CRHBP</i>    | -3,71 | 4,93 | 9,51E-08 | 2,38E-05 |
| <i>CD34</i>     | -3,80 | 5,23 | 2,31E-07 | 4,28E-05 |
| <i>ATP10A</i>   | -3,93 | 5,31 | 4,23E-10 | 2,75E-07 |
| <i>BAALC</i>    | -4,15 | 7,25 | 5,02E-07 | 7,62E-05 |
| <i>BEND4</i>    | -4,69 | 4,42 | 1,20E-10 | 9,93E-08 |
| <i>LRP6</i>     | -4,78 | 4,29 | 4,10E-11 | 7,47E-08 |
| <i>SDK2</i>     | -5,29 | 4,83 | 8,71E-18 | 3,97E-14 |
| <i>TRH</i>      | -6,04 | 4,54 | 8,84E-11 | 9,70E-08 |

**Table S4: Sequences and localization of the 33 lncRNAs differentially-expressed between *NPM1*-mutated and *NPM1*-wild type patients**

|                                                                                                                                                                                                                                                                                                                                                                                                                                                                                                                                                                                                                                                                                                                                                                                                                                                                                                                                                                                                                                                                                                                                                                                                                                                                                                                                                                                                                                                                                                                                                                                                                                                                                                                                                                                                                                                                                                                                                                                                                                                                                                                                                             |
|-------------------------------------------------------------------------------------------------------------------------------------------------------------------------------------------------------------------------------------------------------------------------------------------------------------------------------------------------------------------------------------------------------------------------------------------------------------------------------------------------------------------------------------------------------------------------------------------------------------------------------------------------------------------------------------------------------------------------------------------------------------------------------------------------------------------------------------------------------------------------------------------------------------------------------------------------------------------------------------------------------------------------------------------------------------------------------------------------------------------------------------------------------------------------------------------------------------------------------------------------------------------------------------------------------------------------------------------------------------------------------------------------------------------------------------------------------------------------------------------------------------------------------------------------------------------------------------------------------------------------------------------------------------------------------------------------------------------------------------------------------------------------------------------------------------------------------------------------------------------------------------------------------------------------------------------------------------------------------------------------------------------------------------------------------------------------------------------------------------------------------------------------------------|
| <p>n346526; chr9:139,534,589-139,541,618</p> <p>CCGTTGTGAGTTGCCGCTAGGCACCATGGCAGCTCGGGGGGACAGCCCTCCAGGAAAGCCCTGGCTGCCACTCTGCCCCCTGACTCCTGAATCCTGCCA<br/>         GTCACACGGCCGACGGCTGCATATCGGGGAGGATGGCAGGCTGGGCTGTCTGAGGTGACCAGGGAATGCCAGACGCTTTGGGGTGAGGGTTTGGTTGCCGG<br/>         CTTTGGGGCAGGCCAAGGATTTCAGAGGGGAGTAGGTCGCCGCGATCTTCTGGGGAGGGCCGGCTGCCGAATCTCTGGGATCAAAATGTGAAAAACCCACAG<br/>         GGGGCATTCCCCTGATGACTGAAAGAAGAAGTGGCAGCGTACAGCTGAAGGGAGGCTGTCAGAGTGACCAGAGTGGCCAGTCCAGAGGAGACGGGTGGGGAAAA<br/>         GTCTCCAGGAGCCAGGAGATGCCTTCAAGAAAAGAAATGAAAAGGAGTGTGACTGATGCGTGTGAGAACACGGGGACGAGCCTTGGGCTCCGTGGGAGAGC<br/>         TTGGGTGAGGACCACCCGTGCCGCGGCGACCTCTGATCGTACCCAAAGCTGTGCCCTCCCATTTACGAAAAATATCACCTGCTGAGCCCTTGTCTGCTCTCT<br/>         GGGCGTCACTGTGAGTGCACTGTGGAGTTTACGGACACCGGCCCGCGACGGTGGAGTTTACGGGGACCGCCCGCGATGGTGGAGTTTACAGACACTGGC<br/>         TCCCGGACGGTGGAGTTTACGGGACCGGCCCGCGACGGCAGAGTTTATGGGACCGGCTCCCGGACGGTGGGGGCCACGAGTCCAGCATCTGCAGCA<br/>         GAGTCGCGGATTCATGAGGTGACGAGTGTGCCACTGCAGACCTCGGGAGCCACCATCCAAAACCAATTGAGAATATTTCCATTACTTAGGAAAAAGCTTCTC<br/>         CGTCCAGCTGAGGCGGGATGTCATAGACTTACCCTCCTACCCGAAACAGCCAAAAGCAAACAAAACAGACAAAACGCAGACACATGGCTTCCAAGACACGGGAC<br/>         ACCAGGCATTAGAGGACAGTAACCCTGAGTGTGGAAACAGCCGTGCCCTAGTCAACCGTCTCACTGCCCTGGGAGGCAGTCCAGGCTGTGGGTGGGAAGGCGG<br/>         AACCCAGCAGGTCAGTGGACCCCGAGGCTGGACAGACCAGGCGGCTCGAGTTTATGGACACAGTACCAGAGTGGAGAGGGTGCACAGAGAGGGACCCCT<br/>         GAAGACCTGGATGGAGCCCTGGAGTATTTGGAAGAGCATGGCCCTGCCGATCCCATAAAGGAACTCCCGAGGGTGGGTAAGGACACCCGGAAGGATGAGAG<br/>         GGAACAGGGCCGACTCCTGCAAGGGCTGAGGACAGTGTCTCTCCCATACGCCAAGCAGGAAATCTGTAACACAGGGCCCTTGGGTGAAGCCCTTGGGAAGGG<br/>         CTTGCTCGGGGGGGGACGATCAGCCTGAGCCGAGCTGTGCTGTGAGCCCTCTACCAAGCCATAAAAGCAAGACTAGAAAGGATCAAACCTGCCTCAGATCACTT<br/>         AACCGACGTCAGAGCAAAAGTGAAGATTTCCAGGAAGCAAAAATCCCGGGACCCAGCCAGGTGAAATTCACAAAGGACTGGCGTCCAAAAGGAAGAGGACCTGC<br/>         CAGGCAATGGAAAAGCAGGAGAACGGGACCCATGATGAGAAAAATGATGTAATCAAACCATCCAGGGGTGGGTGCGGTGGCTAACGCTGTATCTAGCACTT<br/>         TGGGAAGCCGAGGTGGAGGATCACTTGGGCCAAGAGTTCAAGACCAGATGGGGCAACATAG</p> |
| <p>n405918; chr9:124,217,319-124,262,306</p> <p>CACGTGCAGGCCGAGAAGGCAAAAAGGCCAGCCACTCTACCCGGGATTTTATCCGCTCCCGGACACACACACTCTACTCACGCACTCGCTCGCCGGCC<br/>         TTCAGCTGTCTGTGTCGGGGCGGGACCGGCTTGGCGCAGCCCGCTGTGAGCGCTCGCCGGCTCCTCGCGCCCTACCCGCTGCCTCTGCCAGAGCAGAA<br/>         GCCCGCCCGCCGCGCCACGGCCGGGAGGACGCGCTCCGCTCGGGCGGAGGCGCGGCTGGCTGATCAGAGCGCTGAGGCTTCCGCGGGCCGGAGCT<br/>         GGGCGGCTCTGCTCAGCCAGCTCACCGCGCCCGCCCTCGCGCCCTGTTCTGCGGATCAGGAGTTGAAACCAGCACCTTCCCTTCTCTGAGTCTGCCT<br/>         CCTTCTGCAGAAAGGAGCTCAAAAGAACTTTGTTGTTTGCCTTTACTCTGGGGTGAAGCGGCAGGAGGATGTGAGATGGTGAATGATTTGCTTCTGCCATGCT<br/>         GGGGTACGGGTGGATCGCCCTAAACTCTCGGTGGCCCTCAGTAGTTTTGGAAGAGGACCAAGTCTTGTCTCCAGCAGTGGACCTGGAAGAAGGATGCCGG<br/>         CTCAGGACTTCTACTGAGAAAATAATGAATGTCAAAGGAAAAGTAACTTGTCAATGCTGGTTGTCTCAACTGTGATCATTGTGTTTTGGAAATTTATCAACAGCACAGA<br/>         AGGCTCTTTCTGTGATATATCACTCAAAAACCCAGAAAGTGTGACAGCAGTGTCTCAGAAGGGCTGGTGGTTTCTGAGCTGGTTTAAACAATGGATCCACAATTAT<br/>         CAACAAGGGGAGAGACATAGACAAAAGAAAAGGAGAGAGGACCAAGGAAAGGAAATGACACAACAGAGCTCGGCTATGGGACTGGTTTAACTCAAACCTG<br/>         AAGGAATCCGAATAACTAACTGGACTTGGTTTTCTGACTCAGTCTTCTAGAAGACTTGAGAGATCATGCGGTTAAGGAGTGTGTAACAGGGGACCCCT<br/>         GTTGGGACTGCGAGATTCTCAAGGGGAAGGACTGGGTCTCATTCTCCCATCTCAGCGCTTAGCAGGATGACCTGGTATAGAGCAGGGAACTGGGAAATGTGGGTCA<br/>         GGGATCAGACACTCCAGTTGGGTCTTTTATAAATAAATGGCAAAAGGCTCCATACCCTTCTCCTTCTTCTACCCTCCACTTTATCTGCAAAATGGGAATGATGA<br/>         TAACACCCACTTCATAGAATGGTTCATGAAGATCAAATGAGAGAATAAAAAGTCAAAGCACTTAGCCTCTGGTGACAATAAGTATTAATAAGTATACCTATTCTCTTTT<br/>         CCTTTTTTAAAAATAATATTACAAATGTCCAGCTTATACACATTTACAAGACTTAGCTAGTGGGCTATGTTAGAGCTACTAAAAGATCTTTGACAAGCTAAAACCTAAAGAT<br/>         GCAATGAATGAGGTGTAACGAACAAGAGAGTTTTAAGTTCAAGAAATGGTTACAGAAGTATAAGACAGCTGTGTGGGTGTTTTTGGTTTTTGGTTTTCTGGTTTTACAATCT<br/>         CGTCATTAAACAAGATGGGAGTTTTATAGAATAAAAGCACCATGTAAGCTACTAAAACAACAACAAAAGGCTCATCTTCTCAGTCTGAATTGACAAAATGCC<br/>         AATGCAAAATAAATGATTACTTTTTATTT</p>                                                                                                                          |
| <p>XLOC_005798; chr1:25,188,258-25,189,524</p> <p>GGCAGGAGCTGGTGGCAGCCTGTGCCCTGGCATGGGGCTGAAGTCACTACAGGTCACCGATACTGGCAGTCAAGGAAAGAACTGGATGTGGACCCCTGGG<br/>         CCCACGAGGATGGGGTCCAGGTGACAAAACGTCACCTTTTCTGACAGTGGAGAAAACAGCCACCGAGTTTTCATGCAGGCCACAGGGAGGAGCTTGTCTGGAG<br/>         AATAATACAGCAAAAGAGACTGGCAGTGCAGCCTTGAACGATTCAGGCCGTAGCTCGCCCTCCTAAGCACCTTCCAAACTGCGGTGCCTCTGTGGGAGTGT<br/>         GGCAAAGCTAACAGCAGCTTCTGCCAGAAGGGAGTGCCTGTGAGAGCTGCGGGCACCGTCTAGGACAGGGATGCGGTAAACTCTCTGTGTTGCTGAAGGAGGG<br/>         GCCTGTGGGGAGAGTGACGGGCCCTGTAGCCCCAGAAATCTGCCCGGTCACCTCCACCTTCTCCTTAAAGGAATGTGAGCTGCAGGCTTCAAGAGCCCCAGATG<br/>         TTGGCCACCAGCTTTGAAGCTGCCACAGCCTTCCAGGACAAACTGATGGCCGCGCCAGGGTAGGAGGAGCCAGCAGATCCCCACCATTTTCTGGAGGAG<br/>         TCCAGGACAAGTCAATTTCTAGCCTATGCAAGTCCGCTTGTCTGGCCGGGTAGCCAGGATGGCCAGTGGCCATGCAACCTCACGTCCTTCC<br/>         CGCCGACCACTACTGCGTATGGAGGGGGAGCGATACCACAGAAGTTCTGGCACCTTCTGATCTCCTTTGCACTTCCAGT</p>                                                                                                                                                                                                                                                                                                                                                                                                                                                                                                                                                                                                                                                                                                                                                                                                                                                                                                                                                                                                                                                                                                                                                                                        |
| <p>XLOC_007987; chr1:151,915,378-151,918,279</p>                                                                                                                                                                                                                                                                                                                                                                                                                                                                                                                                                                                                                                                                                                                                                                                                                                                                                                                                                                                                                                                                                                                                                                                                                                                                                                                                                                                                                                                                                                                                                                                                                                                                                                                                                                                                                                                                                                                                                                                                                                                                                                            |



AAACTTTAATCACAGGAAGAGGCTGTTGGCACCCGAGAGCTGCACATAGCAGTGCAGAAAGTAAAGAGAAAAAGGGGAGGCCAAAATAACATAATTACTTCTCA  
CAGCTAGGATATGTCTACCAGATTACACTGAACTACCTGAGGATGACTGGAACAGAGATAGTGGTAATTAATTAAGGCTTACTATGAGGCCTCTTAGTCTTCAa  
tcattattcattttaaagatgaagaactcagatcaccagagcttaattgtatgtctggtgagtaacaggccaggatcaagccatcagcttctccaggccaccacccttaaccattatgTCTGATGACCTCGGGTTATAG  
GAAAGGAGAGCCCTACAAGTTATTGATGGATTTTGTTCATTTGTTTGTCTGCTGACTATAGTAAATTAATCAAGGCTTTAAAGACTAAAACAGGATGGATTTCTAA  
TTTGACAGTTAACTGCTAAGGGAGCAAAAACGAATTGTGTAGTGGAGACCTGGCTACCAAGATGGACATGTTCCAGTACAGGCATAGAGAAAGTTCTCTGTTTGGT  
GCCATCAACTAAGTCTTCCCTATACCTGGCAGTGTACCATCTTTCACAGTACAGATTCTGCCACTTTGGCCAGGCGTCTCATTAGTCCCACCCTCATCACAAA  
AGAGTCTACTGGGACAGGTGAGCACAACCACCAACCTGACCCAGAAGCATAAATCACAAGAACCTATCCTGCTGGCAGAGGGGAGCAAGGGCCACCAAGGACAGCC  
TCATCCCTCGGAGAAATGTCTCATTGCCAGGATGCCTCATTGGCTGCTGAAATTTGGTGGACTCAGGAAAGTCTATTAGCTCTGAGTCCAGAGCTGTTGTTTGGAG  
TCAAGATGAAAAAGGAGCAATTTACATTTATCTAATGCACAGCTAAGAGTGGAGGTTGGGTGAACCTGATTTCAAAAAGCAAACTGAGTATTAATTTACCCACTTTT  
TAAAGCGCTGACGTGATGTAAGGATGCTGCTATTGTTGGCTAAACAATTTCTTAGGTCTAATTTGGGTCTAATAGGTTGACATGAAGCTCCTCTGGGCTCACAGCATTG  
TGCTGTAAGCACTGTAGCTATGCTGTGTCAACGCAAAAGCATCGTCCacagtaagcaagtgtagagllttgtcaccacattagttgctcctGGAGAGTCAAGCAAAAGCTGCTGCC  
AGAAATTCATCTTATCATCAGAGTACAACCTTcaggctgctggatctatgccaccctcgcattactagctgtgtagcggcagttacttccctctctgctggttctactgtaacaggacagaaaaatlttcta  
cttttagggctcgtgagatcaagaagtlaattcatgccaactgctgtaagagttcctggcaTGTGTTTGCACACACTTCAATCTTGGATTAAGAACTTGGCATTTCAGTTGAACCTACGGTATTCT  
GCCTGAGCGCCCTCAGCCTGCCCTCTGAAATAGGGTATGTAGGGAATACAGTTTGTCTTACTTACTGGGACACTGCTATATACAAGGCCATGTTTATCTAATTTCTCT  
CTATTTTGTCTATGTACAGTTTTTCTAAGTATTTACAAGCAAAAGGACCTCACCAGAAATTTTGGAGGCTTAACAGGGCTAAGTCAAGCATGATTACTTTTAAAAATAATTC  
TGggccaggccacagtggttcatgctgtaactcagcaacttggggagctgagtgaggatcacaagaccaggagttcaagaccagcctggccaaatagcaaaacccaccctataaaaaatagaaaaataaaaaGA  
AATTTCTGATCAGATTTCCAAACCAAGCCTGTATCATGTTCAAAACAGGGAGTCAAGTGGACTTCAAGCAAAACCAACCAATAAGCCACATATTGCAATAAATTTCACTA  
GTGCAGGGATGAATGATTCTGTGGAATGAGACCTAATTCCTGTTGATTTAATTCACAACCTCCTTCAGAGAGAGGGGTATAGGCAGCCATCAACCTCCTCATTGTCCCT  
TGGAAatcttaaaaggaagcagtaggtaatagctgggaagagatgagcactgggcaactgctgctgcccacttggcaagcaaaacacactatllacttgaatgaalattatggggagggggtctgtgagggaaggg  
gctgaagtcocccaaatgctactggttctggcaactTTCCTACTTAAATGACAGAGTGTGTTAGTTAAATCAAATATTTACCTTAATATGTTTAAAGTATTTTGGAAATTTCAA  
ACATTTCTTCTTCCCTTCCCAAATAGATCAACAGGACCTCCTGGAGTATTTTAAATTTAGACTTTTCTAGATGATTTAGAAAAAGGAAAGACAAACCAATAGAAA  
CGTTGTTTACCAGAGCCATCTTCTGATTCAAGGACTTCTTTTGTAGTATGTAACCTGATGCTTCAAGTCAAGGATGATGACAGGCATGAAAACACATTTCTTTCTACTAGCTTGAAA  
CATTCTGATGAATGGCCCTAAATGTTTCCGGTGAATGGCTAAGATTACTGATGCTCTACTTCAAGTACAGGAGTCTTATAGATGTGGTGTAGTAAATGCTCAGATTG  
GGTCTTGTCTTTCTATCTCCTCCACATGAGAAGGACTTGACCCTGCTGGCTCTTATCATTGCTATGTGCAGTATTGGGTAAGATGTTCTGTGTGCCAGGCACCAGT  
CAGTTCAAATGCCTTGGAGTGTGATCAAGTACTTaaagagagatgcccct

XLOC\_010909; chr10:61,810,320-61,845,161

CAAGAAGCCTCAAGTTATTTGGATCATATTCAAAAGTCTGCGCATTGAAAATGGCTTCTAGTTCTCTGAACTCAATTTACTAACCCCTTAGAAAAGATCTGATGACGAAG  
TAATGAAGCAAGGGGAGACTACAAGAAGCATTCTGTGGAACCTTACTACGCAAAAGCCATACCTGTCAATCCAGTCTGATGAAACCCACCAGTACTCTTCGAGC  
TTGAGCCGAGGACTCTAGGTTTCCACTTGATGCTCAATCTGCCAACCTGTAATTTGAAGACATTTCCAGTTCTGCTTGAACACGCTTAAGAAATAGCCTGTACTTTTT  
CTTCTGCTATCTCCTCAGACTCTACTCTTCTTCAAGTGAATGTCTCAATAGAGATTTAGTGTCTTCCATCATCTCCTCATCAGGACCAGATTTTCTTCTCCT  
GCTGCTCAGAGCTTACTCTAGTTTCTAGGCTCTGCTGGTTAACTCTTTGGGGACCCAGCAAAATTTCCAAAGGTAATGAGGATACTCACTCAGACATACATTCTC  
CAACTGGCTCTCATCTACATCCACTGCTCAGGCATTTCTGTTAAAGGCACTGAGTCTCCAGTTTGTCTCTTAAGGAAGCGTCTTCTGCAGTACGACTGGAGGT  
CCATCTGCGGAATGCTCTATGTTCCCTGGGAAGGCACTAGCCATCACTCAGTCTACTAGGGGTTCTAAGGGGAGATTTCTATGCTAGAGATATCACTAAAATAATCA  
TCTTGTCTGGAAGGGCAGAGAGAAAAAGTCAACAATGGTCTGGTCAATGGTGAAGGAAAGGAAATTTTCAAAAAGTTCAACGAAGAGGAGAGACAGGAAAAAGCAACAA  
ACCACAGTTTCTGAATTTGTTGGTCTACAAAATAAAAGTCTAATTTTTCCATCAGTCCCAGATTTCTGTTAAAGATGATTTACCTTGATGGAAAATGGCAGTCTATTTTTCT  
TTGAAAAGATAAAAAGTAAAAACAAGTTGCTGTCTCCTTTGAAACATCGCAAGGAAGATTCTACGGGATCATTCAATTTGGCAAAAACAACAACCTTGGCCATATATGG  
AACACATATCAATTTCTGTACAGTTGGTGGCTAACCCACAGTTTCAAAACTTGTAGGCACTGCAAGCCAAAATCTGAGCAAAAACAAAACAGAGATGAAA  
ATGTGGCTATTTAAAGCCAAATCTTAAAAAAGACTACAATTAAAAAAATCAGAATATGAAAGGAACCTAACCAAAACGTTAACTTGTCTTTAAACAGCAAGAT  
GCTTTTTCGATGTATCAACACAGAAACCCCTGTTTGTATTTGAGGATAAATTTGATAAGCAAACTACTACGGATTTTTTTCTCACAACAATTTTTTATGATTGAACA  
CAACAATTTTACTTTCCAAAAGGTAATAAAAACTAATCTTACTGCTTTTGGAAATCCTTTATTTCCATACCTGGCTGAAACATTTGGTTGTAAGGGAGACAACTTTTT  
ATAAACGTCAAAAGGAGTTTCTGATGCTTCCACTGAGCAGGCGAAGTGGCCCTGAGAGAAACAACAGCAGATATGTTGACTTTATCATGGGAGATGCTCCTT  
GAAAAATTTTATCAGATCCTGTTCTTCTTCTGATAGCCACAACCTGGCAAACTTCAACACCTTCAAGTTAATAGTGTGACTAAAGGTAGTTTTCC

XLOC\_013842; chr10:54,246,152-54,246,835

ATTGAAATGAGTTAGTAGCACTTAAATCTGGGGAGCATATTTGATTTTAACTGATGAGATTTAGCTGCTGATTACTCAATCAGCTGTGGTTGGAGTGAAG  
GCACATGATAGAAACATACCATGTAATTTCTGCTATTCTAAAAATATTCAGCATAAATAATTTCCAGATAGTGTGCTGCTGGTGagacagcattctacatctccagtcatttcaagtcctcatt  
ttctctgggttaaacagagttgcttctcactcctggtgagatgcccccaataatacatatttctcctggtcaatgctctcttaaaatgatATGATTTCCCAAAACACTTATGTTCTTAGCTCACATCAA  
TCATATCTCCATTCTGATTAGATTACAAGCCACTGAAGTCCAGGACCTGAGTCAATTTCTTATCCCTCATATCTATTATAAAATCCTAACCGAGGATCACAGTTTGA  
AAAATGTTGTTCAAGAAAGCTATATATGATGATCCACATACATTTAACTTTGTACAGACAAGAATATACATTTTCCAAACATTAATCTCCATAATTAGCCACTGTTTT  
AGCTGGGCCACCTACCATTTTGTATTTGCTTTTCTGCTTGTGGCTTAAATTAATCTTAAACAAAATAACCAGC

XLOC\_018747; chr11:58,756,982-58,767,516









aattcagctgtaaatctatcctggcctgactctttgggtgtaagctataattatgacctatctcagagcaatgtattctatcagagattcaactctctcgtgattcttgaggggtgtagtgtagaggaattatccattctctagattctagttta  
ttttagcaaatatgTTTTATAAAGTATTTTAGAGTATATAAATTTGTGTTTTATGTTCCACAGAAACATATTTTATAGGAGTTAATCTTGACTATCTAAAGGTTATTGTGAACTAG  
TTCCAGCTTTCTCCAATACCCTTGCCACGAGAAAGTAACTAAATCATGTATClattctctctcttattataaataaaggtaalgctgaggaatatacgagatttctgatactctcttattctgagggaaa  
aaacACCACTAAACTATCCCTCTAATCTGTGTAATAGATTAGCTACACTTTCTTCACTAGCAAGATAAAATAAATTTCCACATTTTCTAGTTTACTTTGTAGAAATAAACTCTCT  
GTAATTTGGACTGTATTCAACGAAACTTAGTAAGTTGAATTTATGCCTCAGGTATGTTCTATGCACTGAGTGAAGAGTGGAGATAAAATAAGAAATTTAGATTTTCCTTTA  
CTTTTTAAATAGGTTGTTGCCCTCTTATATTTTATCTATGATGCAAATGTCATATCCTAATTTCTAGTTTTATGTTTAAAGCACACAGTGCCACTTCTATGATTCAAT  
ACATTTGATACCCTTGAATCAATCAGAATACTGCAAAATTAATTTTCTAAAACAATGCTTTATCGTATTCTCTGTGTAATCATCAGTACAATTCCAATGA  
CACTTAAAAATACTCATATTAACATCTTCTTCAACAGAACCATGATGAAGGACAGTGATAACAAATATCTGACAAATGATGATTATTTCTCATCCATGGAAATTTTC  
CTTAAATAAACTAAAGGGCTATTTTCTAAAAGCCAAAAGCATTGCTTACAAGAACTTTTCATCATGACATGGATAGACACTCAGATTACATACATTCAAAGGGAAAGTGTCT  
GTATTTCCCTTTCAATCCACCCTATTCTATTGTGTTATCTTCTTAAATTTTCTATCTACATTCTTCACTTCTTCCCATTTGCCATTGACCTATGTTCTGTGATAAAAAATTGC  
GCAATTTGGAGTCTTTGGGAGGTTAGGTTATGCCCCTTTACCCTTTTCAACATAATCACACATAACACCCCTCTCCATATTTGTAATTTTCAATATACAGAAAAAAGTACTA  
TAATTTCTTCAACATGCTTGATATTAATGATATATGGGAAAACAATTTATTTGTGACGAATCTTCAGATAACTGGGAAAAGCCGGGAAAAAGAGAGATCTGGTGGTT  
ATCAATGACCCTATGTAATAATTTTATTATGTAAGCTGTCTTCACAAATGTCTTATGTATGATCATTAGAACTGTTTTATATATATGTAATTTCCACATTAC  
GAGACATTACTTTCACAGTGAAGTAATCCTTTTTAACTGCCAC

XLOC\_075298; chr4:89,336,836-89,376,492

agctttaaataagccactcctccactgcaatgaltcacatgctcaatgtcttggtcatgagacaagaacctgatttagctgagcaaggagcaaaatcctgcatcagtagGTTAAGGAAACAGACAGGATCCAA  
GTGTGAGAAAGCCACCCTGAGTCTCTCAGAGTcaaaagacacaacaaagccgacaagtggaattggaaatggaacaaaagGCACAAAGAACATCAAAGCATAAATCCTTCAGGTTATc  
agcaatgacalcctaaagaatctcagaacttggcaccacccagggcclaccggatcagaatctgaatlltaacaagatcagATCTAGTCAAGAGTCCAGTCTGATTTCTCTTTATTGGACTACCACCC  
AAAGCAGAATGAGGATGATGAACCACGCCAGTGACTTCTGGATACCACCTGACTCTAGAcctgaaattccagcagaatggtgacaccaactggtcgaagacccccaaggaactcagctgct  
aggaatgcagttcctccactcctcctcagctcaccctcactcctcaaccaatcagtgatcacacacttaggcaactggtcagacaccccttaaaacccactgcaaacctctggaagcatalttgaglltctctcactctcact  
ttggtttccctcaatataaattctctctgctgcaactcctcttctcagttattgtctctagctgcaacaggaaatcgagactGTTGGTCTTATAGTAAAGctcacagaatagatatacaaggatcgtgatacaaaaaacccg  
gcaac

XLOC\_078730; chr5:120,504,656-120,505,782

CAATAGACACTACAGCATTAAATAACATGTTTATAGGATAAGTTTTTATTGCAATTATCAATGGTGATTAATTAATAGCTTTACAAGGGATGTTTTGGTATTTTTAGCTA  
ATCTTTGGAGTTGGTTCTATATAACATATGCATGTTTAGACATTTAATAGTATTTTCAAGTAAATATTACAGTATTTAATAGGTTAAACATGTGTGCTTGTCC  
AACACAAGGGCAATTTTTCTAGATTACTTGCCCAATTAATGTCTAGTAAATCCCCATAGAAGTGTATGACTTTCCAATATCCGAATATACTCGTTGGTTTTACTATGT  
CAATACCCTGGATTGGGAGGTTAGGTTAGTGGGACTGTACTGTAATTTTCAAGAACTTTACCTTAAATTAATAGTTTGCATTAGTAGAGATTGTAATTTACATAT  
CCAGTTAGCACCTGCATTCTGTAAGGAGACACCACCTAAGCTTTCTGGTTCTATCCATAGCCCATGTTATAGTTTCAGAAGGATACACTCGGACTTCCATTTAAA  
AAGATTGGGAAAAATGGGCTTATTTTTCTTGGGCTACTAAGAGCCCTTAAAGCTAAATTTTACAGATTTTTTTTATTTCATCCATTGGCCCTTCTACATTTAT  
CTTGCAACACACACTTTGGGCCAGCTTCTGTTTTCAATTTAATTTGTTTTACCTTCAGCTAGTTTTGGGGTAAATCACATTGAGAACAAAGAAAAATCGGTTGT  
TTGCCAGAGTTCAATTAAGTATAGTGTCTGTGCCAAGCAGCTGAAAGACAGCTTGTGGCCAGCTCCTTTTTCAACCTCCTGGTAAACAGAGTCTGATAAATCTGAT  
ATTAACAATAGCATTATCAAATTAATTTTAAATCCTTTCAACCTATAATTTTAAAGCAAGATATAAGAACAATTTTTTTCTATTTAGATACCATGGAAGTT  
GTGGCCACTAACCAACATTTCTCATATATAAAATGATGAGTTCTGGATTTAAGGCCAGATTCTTTCACTTCGACTTTGGGAGCCCTAAGTAAATTTAATTTCAATTTATGT  
CTGAAGTTGCATGAACAC

XLOC\_078731; chr5:120,513,301-120,514,526

aatctgctcaatgcatagttgaattttgtaaagctataaattctctttatacagcagtagcaggagatlltcaatagggaAAAAatllaagllttatagctatatctacttagctaaagcctcactcaatgctcaatcctgtt  
gcacctgagataaattgtagaaatacactgcaataacaacacaaatgtaaatltaaatcaatlltagaaagaatllttagaaataaatttaaagattlltagaaataaattctactagtaggattcagacacagctcatt  
ttgttgaataaataacacatcatctataaalaalgaattgtaacatlltcttggggtggggcggtggtglaaglgtagtagatccagatattcaaaaacaggtctaitgaaatlltagagatacaaaataaataaATACAGAGTCA  
GGGTTTTGAAAGTTTAAAGCAgcccaggtgtaggtctcctataatcagcattttggcagactgagaggaagattgttggagcttaggagttcagatcgccggtggaacctgttctctcaagaaattgtaaaatll  
gccaggttggtagtgcctctagcagacttaggagctgagcgtgggagatcaactgagccatgaggtcaggtcaggtgagcggtagcacaaccactgcaatcctcaactggtgcaacagtgagacccatctcaaaaaCA  
ACAACCAACAAAAAAGATTGTTGACCATTTAAATTTTAAAAAGCTAGTTTTATGCAATATAATTTACTCAATTTCAAATAGGCAGAAATGAAAAATGATACACACT  
GTTGAAAAATGCTTATTAGACACCAGGATTGAATCTTAAATTTAATTTTAAAGGCATACTAGACTTATTTTATTAATGTTTGTGTTTCACTGAGGTAGGCCA  
GTGCGAGTTTCAATGTTGATGTTGAGTGTCTTTCAACTCAATCCTTTATCAAACCTCCAGAGACAAAGGTACTGTCCAAGTGTAAATAAAATGAATAAGTCAGG  
ACTTTAAATGATTTCTCTTTAGCAAACCAATAgcttagcaggtgctcagggacagctcttagccagcagctgtggtllcaaatcagc

XLOC\_080771; chr5:56,021,002-56,021,770

CATTGCCATTTATGATACAATGTTTTGTTTTACTTTTTAGTACTGATTTCAAATGAGAAGTGGTTCCTCGTGACATTTTGCTGACAGACGAGACTTTGCAC  
ACCCTGAGGCCATCTCATACTGTGAAGAGGATGCCGGCTTCAGAAACCTCTCAGAGTCAAGTTGTCTCGATTCCCTTTGGCTTAACTTTGCAACACTTCTTTCTC  
TGGCTAATTCAGACTATGAATGGTCTTGTCTATGGAAGAAATGTGATCTCTGTTTAAAGACATTTCCCAatttttttttttttaaatactaaattggttttaaatactaaattggtt  
aaatattattaaacaATTGCACTCAGATTTTCACTATTTTAACTTTGCAATAGGATACAGCAAGTACTTTCTCAGACATTGGGTGAAAAATACAGAGACTCCAGAACCTTTGAG  
ATTGTTGAAATGTTGAAACTGTTTTTAGGTAACATACATTAACCTTTAGAAATGCAACCCGGTGGAGCCCTTAGCTGTTTTGAGCTTTCTGCACatcagtgcaagaagtg  
caggttggataggtatagtcagttggtgtcgctcaactcaacccgctcactcaactaggtatcttcaactctcctcccttagccccactcccgacaggtccgggtatagtttccccctgtgctatggttcaactgtg  
caactccact

XLOC\_083936; chr6:27,863,983-27,864,675

agtgccgcaactctgctcactgcaactcctccctggtllcaagtattctctcaactcctgtagagcagtaactacagacagccgctcagcagcagcaglaattttglttttagtacagacaggtllcaccatgtgcccagcct  
ggtctgagcctcacaagttcgggattacagcgcgagccactgcactcgtgtcttgggggaacacaagaagtcocatacaGCACCTTAAGACCTTTTCATGCTTTATCCCCGACTTTCTATTCCAAGTT  
CTCCCTTTATAAATATCTACATTTAGCTTAAATTTGCAGATAAAGTGCAGATTATGATATTCTTAAACCGAAGTAAAAGTGCAGTTGTCTAAACAAAGGCCAGCAGCATTAG  
AGCAAAAACAGCTGGATATAAAAGCACGccttactctataagagaggtgctatttctgtaaacaccagcagctctgcatlltccattttccagttttagatagatactgaccaagatataatllcactlltctaatl  
ctgctgtaagaacaacatagcaagacatattgataatgccaaactaaatggaactaacaggaagcaggtgtaactgagaaactggaacaaaactgcaatttgattcactgattctccct

XLOC\_085385; chr6:119,685,366-119,687,007



actcgtttatagttctttgctgtggagaagctttaaagtaatagatctactgtcaatgttgctttgttgcattgctttggtgtctttgtcatgaatcttaactgttccctgtgtcccagatggttccaagggtgctccagggtttatagtttgggt  
ttacataaagctttaaaccalccagtgagttttgtataggttaaggaagcgggccagctcagctctcgaGTAATTTCTTTTAAAGTGATAACAGTCTTTGTAAAAAGCCCTAAAGTCATTTAGTGT  
TCCCACCTAAATAAATAAATTGATCACTTGCCTTACAACAGAAAGCCCTAATCATTGTTTTCTCTATCCAGTCCGATTGGTGGTTTTCAAAGACACACTCAAGGAAAG  
AATTTCAAGTGTGGGAAGGTTAAATATAGGACCAAGAAAACAAGGCTTCTGTGCTGAGATGGCATGGAATACTTTGACCATTTCCAGCTAGCCAGGAATGAAAG  
AAATCTGGTGAGAAAAGAAATGAACCGACCCATTCTGGCACACAGCTCAGCACTGCAGCTGCAAGTGAAGAGAGGACTTGGGCCACCAGGCTGACGAGAGACAGA  
GGTGTGGCACTGGGTGCATGCAGGAAGCCTCCTCCAGACAGGGCCCTTGCAACTCTTGCCCAAGCTAATTTCCAGGATTGCCTACCTCATACTTAAAGAAATGCTA  
GTACAGTGTATCTCTGATGTCTCCAGAGGAATTAGATGTTATCTTCTTCACTTCCATCTATACTACCTtagtttctatcaaccacaatlaaccagctlaagagaacacaatlatcctctc  
ttaggtctgaagtccaacacaatataccaagctaaaatcaggggtcggcggggcgtgggggtcttacctggagatctgaggaagaaccgtgctcaggtgtgctcaggtgtgctgactcattccaatgagctatagagctggtgct  
tgttctctgtggctgtagaggactgctctcctctgctctagctccctccatctcagagccagcagcagcagtagatctttctttttctttttctgagagcggagtttgcctgtgtcccaggtggaggggcaatggcgcagctcggctcagc  
caacctgctccccgtcaagtattctcctaccttagctcc

XLOC\_109948; chrX:45,688,377-45,689,937

CGATTAATTCCTTATATGGTAATGTACAAGTACAGGGACTGGTGCCTGGTAGTAGCTCAGGAAAGTtcctccctccctcactcctccctcctctctgtcatccccctgctctgtctccacctcct  
tgttactcttattctttctgtccccctcctctcttGTCCCTTAACTCCCCAGTTTGTGCAATTTGTTTCTGGCCCTCCCTTAGGGACGCTGATCTGGCTTTTGGCTCATCAATGACCTAAC  
GGTGGACTCCAGTGGCTGTTTCTCAATGACACCTGTCTGTTTTAACTTGTGCCAGTTTCTGGTACTTTTTCTTCTTTTAGCCCTATATGATCCCTTTCTTCTCAGGA  
CTAGGCTGGATTCTCTTCCCTTCTAGTTTTTAAAGTATGCTATTCTCCAGTGAATTCAGCATCAACCTGTAGTCAACTCCCTACTCAGCCGCCATCTGTGATCAC  
CAGCATGGTGGCTGCTTCTCACACCTTGACACCATGTTGAATCTTAAAGGCTTCAAGCCCTTGGCTTCTTTTTCTTCCATAAACATTAGCCCAATGCACTCTTCA  
GAGAAGTCTTACCAGCAACCTCAGTTACAGCTCCACAGAACTTTAAAGGCTCCCTCTAGTAGCCCTGATATCAGTCTGGGATTTCACTTCATCCTCTCCATtttctcgtcct  
ctagtgggtgagtcctgtgagcagagctgtctgattattctatgggaactaacctccctcagctcagctgaataaagAGAGAGAACAACTCATTCAATTAAGTACACTTCTATAGATAAGTACTGCTTTAAAGAG  
ACTGAATGTTGATTAGCCACAGGGAAAGAGAAAAGTATAAGATCAGAAAACGACTTCATGGTGATGTTTATGGGAATCTATGGTATTAGCCAGtttataatataaattattata  
TGAAGTAGCACAGTGTGATAGGTAGAATAATGGCTCTCtgcgtggtttggatalggtttctcccagcaaaactaagctgaagttgtcccagtgtagagggtggggcctaataatggggaggtgtggatcataggggt  
ggatcctcatgaatgggtgggtcgtttcacagtacagagttgttgcctcctagactggatagttcccacggagaatggatagctcctgagtgagtggtgtataaagccaggacccccaggtttctgctcacaagctctcctttt  
gacctctcgcagctgtgtagcaagaagcattgcccgaagccagggccatcccctgaaacttttagcctgagagctgtgagciaagaaaacctcttataaattgacctgctcaggtttgtttttttatagcaatacaaaatgga  
gaagacaAAATGGCTAAGACAcctccaagatgtctatgctcctaactcctggaacctgtgagctgattatagcgaaggggaatgaagttggaattggaatgaatgaagct



**Table S5: Validation of RNA-seq results by Fluidigm.** Table shows Pearson Correlation r values for each of the 32 lncRNAs comparing RNA-seq and Fluidigm data, using the CN-AML Cohort 1 (n=40).

| GeneID      | Pearson correlation |
|-------------|---------------------|
| n346526     | 0.89                |
| n405918     | 0.94                |
| XLOC_005798 | 0.92                |
| XLOC_007987 | 0.94                |
| XLOC_010909 | 0.96                |
| XLOC_013842 | 0.83                |
| XLOC_018747 | 0.80                |
| XLOC_028763 | 0.84                |
| XLOC_028770 | 0.91                |
| XLOC_028776 | 0.93                |
| XLOC_028777 | 0.92                |
| XLOC_028779 | 0.90                |
| XLOC_028783 | 0.83                |
| XLOC_034440 | 0.87                |
| XLOC_034443 | 0.94                |
| XLOC_047319 | 0.81                |
| XLOC_050705 | 0.82                |
| XLOC_060742 | 0.64                |
| XLOC_063787 | 0.92                |
| XLOC_067985 | 0.96                |
| XLOC_074912 | 0.86                |
| XLOC_075298 | 0.90                |
| XLOC_078730 | 0.92                |
| XLOC_078731 | 0.87                |
| XLOC_080771 | 0.93                |
| XLOC_083936 | 0.89                |
| XLOC_085385 | 0.17                |
| XLOC_085994 | 0.48                |
| XLOC_087120 | 0.94                |
| XLOC_091735 | 0.88                |
| XLOC_091736 | 0.75                |
| XLOC_109948 | 0.90                |

**Table S6: Patients selected for clinical analysis (CA)**

| <b>Characteristics</b>                                   | <b>Cohort 1 CA (n=25)</b> | <b>Cohort 2 (n=134)</b> |
|----------------------------------------------------------|---------------------------|-------------------------|
| <b>Female Sex</b>                                        |                           |                         |
| No.                                                      | 9                         | 67                      |
| %                                                        | 36                        | 50                      |
| <b>Age at diagnosis</b>                                  |                           |                         |
| Median                                                   | 61                        | 55.4                    |
| Range                                                    | 16-75                     | 20-75                   |
| <b>French American British classification (FAB)</b>      |                           |                         |
| M0                                                       | 0 (0%)                    | 4 (3%)                  |
| M1                                                       | 10 (40%)                  | 38 (28%)                |
| M2                                                       | 7 (28%)                   | 46 (34%)                |
| M4                                                       | 4 (16%)                   | 23 (17%)                |
| M5                                                       | 3 (12%)                   | 19 (14%)                |
| M6                                                       | 1 (4%)                    | 0 (0%)                  |
| NC                                                       | 0 (0%)                    | 5 (4%)                  |
| <b>European Leukemia Net Classification (ELN)</b>        |                           |                         |
| Favorable                                                | 4 (16%)                   | 46 (34%)                |
| Intermediate I                                           | 21 (84%)                  | 88 (66%)                |
| <b>White Blood Cells Count (x10<sup>9</sup> cells/L)</b> |                           |                         |
| Median                                                   | 32.1                      | 34.5                    |
| Range                                                    | 1.23-206                  | 0.9-250                 |
| <b>Hemoglobin level (g/dL)</b>                           |                           |                         |
| Median                                                   | 9.9                       | 9.35                    |
| Range                                                    | 5.5-12.8                  | 5.5-14.1                |
| <b>Platelet count (x10<sup>9</sup> cells/L)</b>          |                           |                         |
| Median                                                   | 78                        | 73                      |
| Range                                                    | 8-367                     | 10-489                  |
| <b>Bone Marrow Blast Count (%)</b>                       |                           |                         |
| Median                                                   | 84.5                      | 73                      |
| Range                                                    | 19-94                     | 10-100                  |
| <b>Mutational Status</b>                                 |                           |                         |
| <i>NPM1</i> mutation                                     | 9/25 (36%)                | 80/134 (60%)            |
| <i>FLT3</i> -ITD mutation                                | 9/25 (36%)                | 58/134 (43%)            |
| <i>CEBPa</i>                                             | 4/14 (28.5%)              | 16/119 (12%)            |
| <i>DNMT3a</i>                                            | 6/25 (24%)                | 19/86 (22%)             |
| <i>IDH1R132</i>                                          | 2/25 (8%)                 | 11/83 (13%)             |
| <i>IDH2R140</i>                                          | 6/25 (24%)                | 17/83 (20%)             |

NC: Not Communicated
