# Supplementary material for: Long non-coding RNA expression profile in cytogenetically normal acute myeloid leukemia identifies a distinct signature and a new biomarker in NPM1-mutated patients
Source: PubMed Central journal article supplement — Haematologica. 2017 Jul 4;102(10):1718–26. doi: 10.3324/haematol.2017.171645 (PMC5622856; doi:10.3324/haematol.2017.171645), 2017-10
Supplement: 2017_171645-Disclosures_and_Contributions.pdf [file 2017_171645-Disclosures_and_Contributions.pdf]

Haematologica  
HAEMATOL/2017/171645  
Version 3

Long noncoding RNA expression profile in cytogenetically normal acute myeloid leukemia identifies a distinct signature and a new biomarker in NPM1-mutated patients

Etienne De Clara, Morgane Gourvest, Hanjing Ma, François Vergez, Marie Tosolini, Sébastien Dejean, Cécile Demur, Eric Delabesse, Christian Recher, Christian Touriol, Maria Paola Martelli, Brunangelo Falini, Pierre Brousset, and Marina Bousquet

Disclosures: The authors have no potential conflicts of interest to disclose.

Contributions: M.H. performed RNA sequencing and the identification of new lncRNAs. M.B., E.D.C., M.G. and C.T. performed Fluidigm experiments. F.V., C.D., E.D., C.R., M.P.M. and B.F. provided patient samples and clinical information. E.D.C. and M.B. analyzed the RNA sequencing data using the EdgeR package. E.D.C., S.D., M.T., F.V. and M.B. performed statistical analyses. E.D.C. and M.G. performed functional experiments. E.D.C., B.F., P.B. and M.B. wrote the manuscript. P.B. and M.B. designed the study.
